# Supplementary material for: Dihydroartemisinin-regulated mRNAs and lncRNAs in chronic myeloid leukemia
Source: PubMed Central journal article supplement (PMC5788658; doi:10.18632/oncotarget.23274), 2017-12-15
Supplement: oncotarget-09-2543-s001.pdf [file oncotarget-09-2543-s001.pdf]

## **Dihydroartemisinin-regulated mRNAs and lncRNAs in chronic myeloid leukemia**

### **SUPPLEMENTARY MATERIALS**

**Supplementary Table 1: Experimental confirmed leukemia-related mRNAs.**

**See Supplementary File 1**
